## Exploring the Stony Coral Tissue Loss Disease Bacterial Pathobiome

### RUNNING TITLE: SCTL D Bacterial Pathobiome

Iwanowicz, D.D.<sup>1</sup>, W.B. Schill<sup>1</sup>, C. M. Woodley<sup>2</sup>, A. Bruckner<sup>3</sup>, K. Neely<sup>4</sup>, and K.M. Briggs<sup>1</sup>

<sup>1</sup>U.S. Geological Survey, National Fish Health Research Laboratory, 11649 Leetown Road, Kearneysville, WV 25430

<sup>2</sup>National Oceanic and Atmospheric Administration, National Ocean Service, National Centers for Coastal Ocean Science, 331 Fort Johnson Rd., Charleston, SC 29412

<sup>3</sup>National Oceanic and Atmospheric Administration, Florida Keys National Marine Sanctuary, 33 East Quay Road, Key West, FL 33040

<sup>4</sup>NOVA Southeastern University  
3301 College Avenue, Fort Lauderdale, FL 33314

USGS disclaimer: This draft manuscript is distributed solely for purposes of scientific peer review. Its content is deliberative and predecisional, so it must not be disclosed or released by reviewers. Because the manuscript has not yet been approved for publication by the U.S. Geological Survey (USGS), it does not represent any official USGS finding or policy.

*Any use of trade, product, or firm names is for descriptive purposes only and does not imply endorsement by the U.S. Government.*

\*Corresponding Author: Address correspondence to William B. Schill, [wschill@usgs.gov](mailto:wschill@usgs.gov)

KEY WORDS: microbial community, SCTL D, coral, MiSeq, 16S rRNA

1 **ABSTRACT** A devastating novel coral disease outbreak, referred to as Stony Coral Tissue Loss Disease  
2 (SCTLD), was first described in 2014. It is thought to have originated offshore of Miami-Dade County, FL,  
3 but has persisted and spread affecting new reefs along the Florida Reef Tract and reefs of at least 8 other  
4 Caribbean jurisdictions. We investigated the microbial communities of clinically normal and diseased  
5 specimens of five species of affected corals using targeted 16S ribosomal DNA sequencing (Illumina MiSeq).  
6 Fifty-eight bacterial sequences were identified using contrast analysis that had enriched abundance in  
7 diseased coral host microbiomes relative to the microbiomes of clinically normal hosts. Several sequences  
8 from known bacterial pathogens were identified in this group. Additionally, we identified fifty-three  
9 bacterial species that had differentially elevated numbers in clinically normal coral host samples relative to  
10 samples from diseased host corals. The bacterial consortia composing the clinically normal and diseased  
11 coral microbiomes were clearly distinct taxonomically. Predicted functional profiles based on taxonomy,  
12 however, were found to be quite similar. This indicates a high level of functional redundancy among  
13 diseased and clinically normal microbiome members. Further examination of the direct sequencing data  
14 revealed that while some bacteria were differentially distributed according to disease status, others were  
15 not. Fifty-two bacterial species were found in both diseased and clinically normal coral host samples and  
16 not differentially abundant in either disease state. These still may be important in explaining the  
17 presentation of disease.

18  
19 **IMPORTANCE** Determining causation is a management top priority to guide control and intervention  
20 strategies for the SCTLD outbreak. Towards this goal we examined bacterial taxa that were differentially  
21 elevated in numbers in diseased corals as compared to clinically normal corals at Looe Key in August 2018.  
22 Many of the bacterial species we detected are known to be pathogenic to humans, animals, and (or) plants,  
23 and some of these have been found associated with diseased corals in other studies. Microbes that were  
24 present (or conspicuous by their absence) in both diseased as well as clinically normal corals were also

25 examined because “healthy” corals from a diseased location such as Looe Key may have been exposed but  
26 may not have been showing frank disease at the time of sampling. Although untangling of causation is not  
27 possible currently, certain bacterial cliques and excess nutrients appear to be potential risk factors in SCTLD  
28 pathology.

29

DRAFT

30 Stony coral tissue loss disease (SCTLD) is a relatively new lethal disease affecting corals along the Florida  
31 Reef Tract (FRT) since 2014. With white plague-like signs, this disease outbreak was first recorded at  
32 Virginia Key near Miami (1, 2). By the winter of 2015, the disease had spread to the northern area of the  
33 Upper Keys within the Florida Keys National Marine Sanctuary. In 2016 and 2017 the disease spread north  
34 through Martin County and south through the Upper Keys (2). Between 2014-2015, SCTLD was found by  
35 W. F. Precht et al. (1) to spread at a rate of 2.5-5 km per month, but this rate of disease advancement  
36 apparently increased to 8-22 km per month in 2017-2018 as noted by K. Neely (3). In 2018, researchers  
37 were observing corals infected with SCTLD in the Middle Keys, and by December of 2019 corals infected by  
38 SCTLD were found well south of Key West and into the Marquesas Keys. Though originating in Florida, signs  
39 of SCTLD were recognized in Jamaica in 2017 and the disease now has been reportedly observed or  
40 suspected in the Mexican Caribbean, St. Maarten, the U.S. Virgin Islands, the Dominican Republic, the Turks  
41 and Caicos, Belize, the Netherlands Antilles, Puerto Rico, and the Bahamas.

42 SCTLD has been found to affect more than 20 of the 45 Caribbean reef-building coral species  
43 (scleractinia), does not seem to be self-limiting as in the case of some other diseases, does not seem to  
44 slow in cooler seasons, and doesn't seem to affect the acroporids (2). The affected species include four of  
45 seven Caribbean species that are listed as threatened under the Endangered Species Act of 1973 and have  
46 been further categorized as either highly susceptible, intermediately susceptible, presumed susceptible,  
47 and low susceptible species (2). It is interesting to note that neither *Acropora palmata* nor *A. cervicornis*  
48 show susceptibility to SCTLD. The disease causes rapid mortality among affected coral species, with a high  
49 rate of transmission. It has affected a large geographic range over the more than five years it has been  
50 spreading. As most coral diseases have low prevalence (<5%) and are not considered contagious (1), this  
51 multi-year outbreak is somewhat of a new phenomenon. The gross morphology of the disease can vary  
52 between sites and species. Tissue loss often appears along the edge of a colony and spreads upward  
53 leaving intact white skeleton (indicative of the rapid tissue loss) before algal colonization within 3-7 days.

54 Tissue loss lesions can also present as patches within intact tissue that increase in size, often fusing into  
55 larger denuded areas. Histologically, the pathology appears to first affect the basal body wall then  
56 progresses upward to envelop the rest of the polyp.

57 Causative agents for coral reef declines in general appear to be diverse and complex. Risk factors  
58 include water pollution, habitat destruction, overfishing, invasive species, global climate change, and coral  
59 diseases (4, 5). This outbreak has increased monitoring and research efforts on SCTLD including its etiology,  
60 transmission dynamics, along with intervention actions to halt or minimize impacts. Interventions including  
61 treatment of diseased colonies with specific antibiotics have been shown to retard or stop the tissue loss  
62 suggesting bacterial involvement in the disease etiology (6-11). The similar disease presentation and  
63 response to treatment across many coral species suggests that the same causative agent(s) are at work  
64 with limited variation among coral hosts.

65 Metagenomic sequencing of 16S rRNA has been widely used to study the microbial composition of  
66 multiple and varied sample types, most notably perhaps, the human microbiome (12-15). Increasingly  
67 however, metagenomic studies have been made on an ever broadening array of environmental microbial  
68 consortia including those associated with plants, animals, water, and sediment (16-19) as well as those  
69 associated with corals (20-25).

70 The aim of this study was to identify possible causative agents for SCTLD that have been affecting  
71 the Florida Reef Tract since 2014. We report here the bacterial consortia associated with five SCTLD-  
72 susceptible coral species (FIG 1). Direct, high throughput 16S amplicon sequencing (Illumina MiSeq) was  
73 used to determine if or how microbial communities differ between clinically normal and diseased corals.

74

## 75 RESULTS

76 We performed 16S sequencing of the bacterial consortia associated with diseased and clinically  
77 normal specimens of five important species of Caribbean stony corals affected by SCTLD to identify  
78 potential causative agents. A total of 10,081,496 sequence reads passed quality filtering with 6,410,207 of  
79 these classified by the One Codex platform at the species level and 1,546 total bacterial species were  
80 identified in the diseased coral samples. Bacterial species detected in the clinically normal coral samples  
81 totaled 1,981. After trimming uninformative species classifications with the lowest read assignments (lower  
82 0.25%), 1,119 and 1,407 species classifications remained from the diseased and clinically normal samples  
83 respectively. Remaining sequence assignments for all libraries numbered minimally 96 to 1,961 depending  
84 on the host sample (Table 2). Thus, the classifications retained for further analyses were those that were  
85 observed a reasonable number of times.

86 **Diversity analyses.** Alpha diversity measures (Simpson; FIG 2) were generally similar among the  
87 coral host microbiomes that were tested regardless of host species and (or) disease status. In contrast, beta  
88 diversity analysis demonstrated that the microbes associated with the diseased and clinically normal states  
89 were of quite different composition (FIG 3).

90 **Distribution of bacterial taxa across coral species and according to disease state.** The distribution  
91 across host corals of the most commonly identified bacterial species are shown in Tables 3 and 4. Two  
92 species of *Achromobacter* and three species of *Fulvivirga* were common among the clinically normal coral  
93 microbiomes (Table 3) and *Achromobacter xylosoxidans* was universally present. Two species of *Arcobacter*  
94 were common among the diseased coral microbiomes with *Arcobacter bivalviorum* being a member of all  
95 diseased microbiome libraries as were *Algicola bacteriolytica* and *Clostridioides difficile*. Contrast analysis  
96 using edgeR revealed fifty-eight bacterial species that were enriched in abundance in diseased coral host  
97 samples relative to clinically normal hosts and are shown in Table 5. Fifty-three bacterial species had  
98 differentially elevated numbers in clinically normal coral host samples relative to diseased host corals

99 (Table 6), while fifty-two bacterial species were found in both diseased and clinically normal coral host  
100 samples and not differentially abundant in either disease state (Table 7). All the taxa listed in Table 3 were  
101 found to be present in clinically normal as well as diseased samples (Table 7) except for *Fulvivirga*  
102 *kasyanovii* that was found only in clinically normal samples (Table 6). All the taxa listed in Table 4 were  
103 found to be among those elevated in diseased coral samples (Table 5) except for *Arcobacter* sp. UDC415  
104 and “*Candidatus Amoebophilus asiaticus*” that were present in both clinically normal and diseased coral  
105 samples (Table 7). Some bacteria known from other studies to be generally abundant and associated with a  
106 wide variety of corals and other marine invertebrates (22) were rare in the Looe Key coral microbiomes.  
107 *Ruegeria*, for example, were relatively low in abundance and restricted to the clinically normal samples  
108 (Table 6). *Endozoicomonas* species abundances in clinically normal coral samples were found to be 0% in *C.*  
109 *natans* and *D. labyrinthiformis*, 0.186% in *D. stokesii*, 0.013% in *O. annularis*, and 1.604% in *P. strigosa*.  
110 *Endozoicomonas* in diseased coral samples was only detected in *O. annularis* at an abundance of 0.582%.

111 **Inferred expression of major gene groupings.** The inferred expression levels of the major gene  
112 KEGG groupings amino acid metabolism, biosynthesis of secondary metabolites, carbohydrate metabolism,  
113 glycan biosynthesis and metabolism, lipid metabolism, metabolism of cofactors and vitamins, metabolism of  
114 amino acids, metabolism of terpenoids and polyketides, nucleotide metabolism, and xenobiotics  
115 biodegradation and metabolism were similar regardless of disease status and microbiome composition (FIG  
116 4). Thus, most functionalities of the members of the clinically normal coral microbiomes are also present in  
117 the diseased coral microbiomes.

118

119 **DISCUSSION**

120 Stony Coral Tissue Loss Disease (SCTLD) is one of the more severe problems to confront Florida and  
121 Caribbean reefs in the 21<sup>st</sup> century potentially causing significant loss to ecosystem services and impacting  
122 economies. This outbreak is unusual due to its extended duration, apparent highly contagious nature,  
123 range of coral species affected, and rate of progression (<https://floridakeys.noaa.gov/coral-disease/>). Based  
124 on reports that amoxicillin can arrest tissue loss progression in several species, a number of researchers  
125 have focused on microbiome analyses to identify potential causative agents. J. L. Meyer et al. (25) recently  
126 reported identifying five amplicon sequence variants that were higher in abundance in diseased as opposed  
127 to healthy specimens of *Montastraea cavernosa*, *Orbicella faveolata*, *Diploria labyrinthiformis* and  
128 *Dicocoenia stokesii*. The identified amplicon sequence variants were found to be from an unclassified  
129 genus of Flavobacteriales, sequences identified as *Fusibacter* (Clostridiales), *Planktotalea*  
130 (Rhodobacterales), *Algicola* (Alteromonadales), and *Vibrio* (Vibrionales). The authors also identified  
131 opportunistic or saprophytic colonizers including *Epsilonbacteraeota*, *Patescibacteria*, *Clostridiales*,  
132 *Bacteroidetes*, and *Rhodobacterales* that were also found to be enriched in SCTLD disease lesions.

133 **Bacterial taxa found to be differentially elevated in abundance according to disease state.** The  
134 taxonomic classifications we report here were performed at the species level using a closed reference  
135 database and a classification first approach, whereas those of J. L. Meyer et al. (25) and more recently  
136 those of S. M. Rosales et al. (26) were obtained using a cluster first approach. Although both strategies are  
137 widely used, each has pros and cons (27). Nevertheless, many of the findings of the two studies have  
138 general similarities regarding taxa identified as differentially elevated in numbers in diseased host corals.  
139 Sequence classifications that we obtained from the clinically normal coral samples were found to represent  
140 mostly bacterial species often found in coastal marine environments. In contrast, we found that several  
141 differentially abundant sequence classifications obtained from the diseased coral samples relate to bacteria  
142 with known pathogenic potential. Particularly notable are those that are common in specimens with active



143 disease signs across the five coral species studied and that are relatively high in abundance. These include,  
144 but are not limited to, *Clostridioides difficile*, *Romboutsia lituseburensis*, *Arcobacter bivalviorum*, *Algicola*  
145 *bacteriolytica*, *Vibrio* sp. r24, *Shimia aquaeponi*, *Burkholderia gladioli*, and *Pseudoalteromonas*  
146 *haloplanktis* (Tables 4 and 5). In fact, *Clostridioides difficile*, *Arcobacter bivalviorum*, and *Algicola*  
147 *bacteriolytica* were found without exception in every diseased coral specimen. *Burkholderia gladioli*,  
148 usually a plant pathogen, produces several inhibitory and (or) toxic substances, among them gladiolin,  
149 bongkrek acid, enaxyloxin, and toxoflavin which can be fatal to humans. The presence of *Clostridioides*  
150 *difficile*, *Romboutsia lituseburensis* and other species often associated with soil, human, and animal gut  
151 consortia may implicate surface runoff and (or) fecal contamination as a contributing factor to SCTLD.

152 **Bacterial taxa found not to be differentially elevated in abundance according to disease state.** In  
153 addition to the bacterial species found to be differentially elevated in abundance according to disease  
154 state, some prominent species' numbers were found to be relatively constant regardless of disease state  
155 and therefore their function(s) as microbiome members are important to consider. *Achromobacter*  
156 *xylooxidans*, *Achromobacter denitrificans*, *Prosthecochloris vibrioformis*, and "*Candidatus* *Amoebophilus*  
157 *asiaticus*" were in this class as were several species of *Halodesulfovibrio*. *Achromobacter xylooxidans* has  
158 been identified as an amoeba-resistant bacterium (ARB) in several studies (28, 29). Many free-living  
159 amoebas including *Acanthamoeba*, *Dictyostelium*, *Hartmannella*, and *Naegleria* can harbor bacteria (30,  
160 31). ARBs have defense mechanisms that allow them to avoid ingestion or to survive in amoeba and other  
161 protists intracellularly and multiply. They may even persist through the resting cyst stage of the amoebae.  
162 Bacteria that can survive within amoebae gain protection from environmental insults from their amoeboid  
163 host (28, 32, 33). Because the survival mechanisms possessed by ARBs are similar to traits required for  
164 survival during infection of higher eukaryotes, ARBs are often found to be pathogenic (28, 29, 34-37).

165 "*Ca. Amoebophilus asiaticus*" has been found widely in Caribbean corals (22) and was found to be  
166 among the dominant members of both the clinically normal and diseased Looe Key coral microbiomes  
167 sampled. Although it is an obligate endosymbiont of *Acanthamoeba* of the T4 grouping, it has not been

168 possible to transfer it to other amoeba to date (38). This potentially indicates that this microbe is not  
169 widely amoeba-compatible or that its primary host may be something other than amoebae. Analysis of the  
170 genome of “*Ca. Amoebophilus asiaticus*” (39) revealed that it shares eukaryotic domains that are  
171 significantly enriched in the genomes of other intracellular parasitic bacteria (including chlamydiae,  
172 *Legionella pneumophila*, *Rickettsia bellii*, *Francisella tularensis*, and *Mycobacterium avium*). Thus, these  
173 diverse bacteria appear to exploit common mechanisms for interaction with their hosts. It is not clear if  
174 “*Ca. Amoebophilus asiaticus*” is internal to coral-associated free-living amoebae, or if the bacterium infects  
175 coral amoebocytes (40). If internal, the parasitic nature of this microbe might predispose corals to biotic  
176 and abiotic disease. If other amoeba-resistant bacteria that are present in high abundance (i.e.  
177 *Achromobacter sp.* as shown by amoeba co-culture) are also intracellular, the combination could be further  
178 debilitating. Amoebae are considered training grounds for bacterial pathogens and “*Ca. Amoebophilus*  
179 *asiaticus*” has an impressive number of insertion sequences in its genome (39) as does *Achromobacter* (41-  
180 43) making horizontal gene transfer and dissemination of virulence elements very possible in the  
181 confinement of intracellular space.

182 *Endozoicomonas*, another taxon that is known to be endosymbiotic, can be dominant in many  
183 coral and marine invertebrate species (44-47) achieving abundances as high as 85% (40, 44).  
184 *Endozoicomonas* is known to be capable of intracellular as well as free-living lifestyles, is sensitive to  
185 dysbiosis of the microbiome, and is diminished in intracellular numbers under unfavorable conditions.  
186 *Endozoicomonas spp.* are generally thought to be associated with healthy hosts (22, 48), but exhibit  
187 multiple relationships with their hosts, transitioning through symbiotic, mutualistic, and parasitic roles  
188 opportunistically (46). This endosymbiont has been thought to provide for metabolism of  
189 dimethylsulfoniopropionate (DMSP; (49-53) but genes for processing of DMSP were not identified in  
190 sequenced species (45, 46). Recently, however, K. Tandon et al. (54) have identified a dominant coral  
191 bacterium, *Endozoicomonas acroporae* that does metabolize DMSP. Other than DMSP processing, this

192 endosymbiont is thought to provide benefit to the host including nutritional functions (55), antimicrobial  
193 functions (56), and functions associated with algal symbiont interactions (44, 57). Interestingly however,  
194 *Endozoicomonas* can also be a pathogen for fish (58). The finding of low *Endozoicomonas* abundances (less  
195 than 1.6%) in the bacterial consortia of multiple coral species at Looe Key regardless of disease state may  
196 be an indication that the “clinically normal” corals were stressed and (or) infected but not showing frank  
197 disease at the time of sampling. Disease and mortality continued unabated, in fact, throughout 2018 as  
198 SCTLD moved southward along the Florida reef tract.

199 **Potential nutrient influence on affected coral microbiomes.** Sewage contamination and surface  
200 runoff has long been recognized as problematic for coral health (5). V. N. Bednarz et al. (59) found that  
201 diazotroph-derived nitrogen assimilation by scleractinian corals was dependent on their metabolic status.  
202 More recently, T. Lachnit et al. (60) found that coral microbiome exposure to nutrient-rich conditions leads  
203 to dysbiosis and disease development. Another study has examined the impacts of land-based sources of  
204 pollution on the microbiota of Southeast Florida coral reefs and found that the major influence was from  
205 sewage outfalls adjacent to reef tracts, but that runoff from inlet outfalls was substantial as well (61). B. E.  
206 Lapointe et al. (62) have recently reported on a three-decade study of nitrogen enrichment at Looe Key and  
207 found a connection with reef decline. Nutrient levels can also modulate parasitic infections as shown by J.  
208 G. Klings et al. (63) who have recently identified a marine invertebrate-associated Rickettsiales parasite  
209 that the authors found is encouraged by nutrient enrichment to overgrow and weaken and (or) kill the host  
210 coral cells it infests.

211 Excess nutrient levels that have been identified along the Florida Reef Tract may also drive another  
212 adverse process in stony Caribbean corals that may explain SCTDL pathology. *Prosthecochloris vibrioformis*,  
213 found in great abundance in all our coral specimens, is a strictly anaerobic green sulfur endolithic  
214 bacterium that has nitrogen assimilation and reduction pathways and produces proline in nitrogen rich  
215 environments (64). Proline has been found to be essential for the growth of *C. difficile* as well as other

216 pathogens (65). *C. difficile* is a strict anaerobe that would be expected to locate in coral anoxic zones such  
217 as in the skeleton or at the skeletal-tissue interface. *C. difficile* produces toxins and is also known to  
218 produce para-cresol (p-cresol), a compound that is inhibitory to many Gram-negative bacteria that is  
219 thought to play a role in the ability of *C. difficile* to colonize tissues (66). An abundant species that we found  
220 ubiquitous in our coral specimens, *Achromobacter xylosoxidans*, can degrade p-cresol via p-cresol  
221 methylhydroxylase (67) unlike many other Gram- negative bacteria and would be immune to the effects of  
222 p-cresol. Additionally, although *Achromobacter xylosoxidans* is generally classified as aerobic, it can  
223 function anaerobically via denitrification (41). *Clostridia* have been found to be present in high abundance  
224 in coral skeleton and *Prosthecochloris vibrioformis* is dominant in stony corals due to the density of their  
225 skeletons providing a very anaerobic environment (64). Thus, it is possible that excess nutrients fuel  
226 *Prosthecochloris vibrioformis* growth and nitrogen fixation that subsequently supports *Clostridioides difficile*  
227 colonization, growth, and coral tissue damage via toxin production. The production of toxins at the tissue-  
228 skeletal interface may explain the observation that SCLTD pathology first affects the basal body wall of the  
229 coral polyps.

230 **Taxonomic redundancy.** Finally, we tested to what degree members of the clinically normal and  
231 diseased coral microbiomes had similar inferred functionality profiles. Beta diversity analysis demonstrated  
232 that the microbes associated with the two disease states were quite different. The inferred expression of  
233 major gene groupings for these two groups, however, was similar regardless of disease status and  
234 microbiome composition. This result is similar to that found in other complex microbiomes including the  
235 human gut (13) and the algae, *Ulva* (17, 68) and reveals the redundancy of metabolic potential in coral-  
236 associated bacteria and the fluidity of specific bacterial species membership in the microbiomes of clinically  
237 normal and diseased stony corals.

238 **Conclusion.** While disease outbreaks are not uncommon, this event is unique due to its large  
239 geographic range, extended duration, rapid progression, high rates of mortality and the number of species

240 affected. The disease is thought to be caused by bacteria and can be transmitted to other corals through  
241 direct contact and water circulation (11). This study reveals the bacterial component of SCTL D specifically  
242 at a place and a time associated with a disease that is moving rapidly both geographically and temporally  
243 (69). Our inferences are made based on the abundance of bacterial sequences in diseased versus clinically  
244 normal states. Abundance is not an unequivocal measure of causality, however. It is possible that some  
245 rare, but influential bacterium somehow triggers remodeling of the coral microbiome (70, 71) given the  
246 variety of interactions among coral-associated bacteria (72). The redundancy of the microbiome members  
247 functional repertoire observed in this study as well as others (73) suggests that the makeup of the coral  
248 microbiome is a rather fluid thing influenced by space, time and abiotic factors. The dysbiosis generated  
249 from transient membership changes and microbiome remodeling in response to environmental  
250 circumstances may result in bacterial cliques being formed that collectively exhibit properties that have  
251 pathological implications for the host.

252 Unfortunately, it is not possible to pinpoint a specific causative agent for SCTL D at this juncture. It is  
253 possible, however, to offer some hypotheses regarding the SCTL D pathology. It is tempting to conjecture,  
254 given the evidence presented here for example, that microbial endoparasites (such as “*Ca. Amoebophilus*  
255 *asiaticus*”) may predispose Caribbean corals to infection by opportunistic pathogens normally held at bay  
256 by a healthy microbiome including beneficial endosymbionts such as *Endozoicomonas* or that *Clostridioides*  
257 *difficile* introduced by terrestrial or surface runoff and fueled by excess nutrients may reside in the anoxic  
258 zone at the skeletal-tissue interface and produce the histopathological effects observed with SCTL D.

259 There may not be a single specific pathogen that causes SCTL D, but rather a polymicrobial mixture  
260 of bacteria each adding their “special touch” to the disease process and not necessarily being consistent in  
261 composition from one location to another or over time. We have identified a relatively short list of bacteria  
262 associated with SCTL D pathology. Our findings combined with those of prior and ongoing studies should  
263 help to guide the search for the causative agent(s) of this disease and their isolation into culture for

264 detailed study. Proteomic and (or) metabolomic approaches may help to identify universal pathogenic  
265 mechanisms that operate regardless of the exact microbiome composition.

## 266 MATERIALS AND METHODS

267 Five coral species (FIG 1) were targeted for collection on August 26, 2018 from two closely situated  
268 sites (separated by only 444 meters) at Looe Key, within the Florida Keys National Marine Sanctuary, (Table  
269 1) under permit number FKNMS-2017-100, expiration date December 31, 2018. Duplicate specimens from  
270 actively diseased and clinically normal coral colonies were collected from *Orbicella annularis* (OANN),  
271 *Diploria labyrinthiformis* (DLAB), *Colpophyllia natans* (CNAT), *Pseudodiploria strigosa* (PSTR), and  
272 *Dichocoenia stokesii* (DSTO) except for *D. labyrinthiformis* for which we had only one clinically normal  
273 specimen). Coral specimens were collected in the 2-5 meter depth range on scuba using hammer and chisel  
274 to collect fragments. Fragments were placed in zippered plastic bags for transport to the surface. Each of  
275 the coral specimens was placed into a separate 5-gal bucket filled with local natural seawater and covered  
276 with a lid. These samples were transported (approximately 1.5 h) to the Everglades National Park, Florida  
277 Bay Interagency Science Center (FBISC) in Key Largo, Florida for subsampling and processing. Samples were  
278 processed for two different analyses: 1) metagenomic sequencing of bacterial suspensions from coral tissue  
279 homogenates, and 2) amoeba co-culture for ARB capture. A subsample (approximately 3.25 cm<sup>2</sup>) that  
280 included tissue and skeleton from the disease margin of affected specimens or clinically normal specimens  
281 was homogenized in a pre-sterilized mortar and pestle by grinding the tissue section in 2 mL of filter-  
282 sterilized artificial seawater (Instant Ocean Spectrum Brands, Blacksburg, VA) into a slurry. The  
283 homogenates were transferred into 2 mL sterile microcentrifuge tubes and centrifuged at 180 x *g* for 10  
284 min to remove cellular debris. The supernatants (1 mL) containing bacteria were then recovered, bacteria  
285 were pelleted at 10,000 x *g* for 5 min, and the pellets were resuspended in 800 µL DNA/RNA Shield (Zymo  
286 Research, Irvine, CA) and frozen until DNA was extracted and used for direct 16S amplicon sequencing.

287           **DNA extraction, amplification, and sequencing.** Genomic DNA from all bacterial suspensions  
288 prepared from tissue homogenates was extracted and purified using the Zymo *Quick-DNA Fecal/Soil*  
289 *Microbe Miniprep Kit* (Zymo Research, Irvine, CA). All extracted DNA was stored in the supplied kit elution  
290 buffer at -20°C until polymerase chain reaction (PCR) was performed. Negative controls included kit  
291 reagent and field blanks. Positive controls were provided by extracts of a ZymoBIOMICS Microbial  
292 Community Standard (D6300; Zymo Research, Irvine, CA). Bacteria were characterized using PCR that  
293 targeted the V3 and V4 portion of the 16S rRNA gene. Amplicons were produced in two steps, first using  
294 standard primers to generate a high concentration of input template followed by less efficient fusion  
295 primers that incorporate exogenous sequencing adapters. Sequencing of 16S rRNA used primer pair  
296 sequences that create a single amplicon of ~460 base pairs (bp). The primers for the first amplification  
297 reaction were 16S Forward (5' – CCTACGGGNGGCWGCAG – 3') and 16S Reverse (5' –  
298 GACTACHVGGGTATCTAATCC – 3') (74). The thermocycler program had an initial denaturation step of 95°C  
299 for 3 min, followed by 35 cycles of 30 s at 95°C, 30 s at 55°C, and 30 s at 72°C, for 7 min. An appropriately  
300 sized amplification product was confirmed for each reaction by electrophoresis of 5 µL of the reaction  
301 product through a 1.2% I.D.NA agarose gel (Cambrex Corporation, East Rutherford, NJ) at 100 V for 45 min.  
302 PCR products were cleaned with the Qiagen PCR Purification Kit (Valencia, CA) and quantified using the  
303 Qubit dsDNA HS Assay Kit (ThermoFisher Scientific, Grand Island, NY). Samples were diluted in 10 mM Tris  
304 buffer (pH 8.5) to a final concentration of 5 ng/µL. Using the 16S rRNA primers modified with the  
305 sequencing adaptors specified in Illumina's 16S Metagenomic Sequencing Library Preparation (CT #:  
306 15044223 Rev. B), amplicon libraries were prepared following the manufacturer's protocol. Each sample  
307 was indexed with Illumina's Nextera XT multiplex library indices, which incorporates two distinct 8 bp  
308 sequences on each end of the fragment. Libraries were quantified with the Qubit dsDNA HS Assay Kit  
309 (ThermoFisher Scientific, Grand Island, NY). DNA size spectra were determined with the Agilent 2100  
310 Bioanalyzer using the Agilent DNA 1000 Kit (Santa Clara, CA). The combined pool of indexed libraries was  
311 diluted to 4 nM using 10 mM Tris pH 8.5. A final 10 pM preparation was created with a 15% PhiX control



312 spike and run on a MiSeq 600 v3 cartridge. DNA sequences (16S) derived from the microbial consortia of  
313 clinically normal and diseased coral samples as well as reagent and field blanks were treated identically.

314 **Sequence analysis.** Sequences were classified taxonomically using the One Codex  
315 (<https://www.onecodex.com/>) pipeline (27, 75) by uploading machine-processed, quality filtered, and de-  
316 multiplexed FASTQ files to the One Codex web site for processing against the curated targeted database  
317 available there. Classification assignments were then downloaded from the One Codex web site as  
318 Microsoft Excel files for data cleaning and statistical analyses. Low-abundance, non-informative  
319 classifications were removed from all data sets by trimming taxonomic assignments of sequencing reads  
320 from the bacterial component of each coral host to exclude those whose frequency was less than 0.25% of  
321 the total classification assignments associated with that coral host. Remaining classifications were then  
322 combined to obtain master lists of bacterial species found in clinically normal and diseased corals and  
323 ranked according to the number of reads classified to each member. Sequence classifications from amoeba  
324 co-culture of disease-associated samples were treated similarly. Excel pivot tables were used to examine  
325 the distribution of identified bacterial species across coral species.

326 **Statistical analysis, diversity, and functional profiling inferred from bacterial taxonomy.** Sequence  
327 classifications filtered as described above were also imported into MicrobiomeAnalyst (76) for further  
328 analyses including alpha and beta diversity, statistical analysis of bacterial association with disease state,  
329 and inference of biochemical pathways expressed in the consortia. Classifications were additionally filtered  
330 to remove those with a prevalence of less than 20% across samples and features with low variance (less  
331 than 10% based on the interquartile range). Data was transformed using the centered log ratio (CLR)  
332 method (77). Beta diversity was examined using Analysis of Group Similarities (78) of Jensen-Shannon  
333 Divergence measures and visualized by NMDS (Nonmetric Multidimensional Scaling). Differences in the  
334 bacterial community composition between diseased and clinically normal corals was examined using the  
335 edgeR (79) method with an adjusted p value of 0.01. Finally, gene expression was inferred using the



336 Tax4Fun module (80) of the MicrobiomeAnalyst package. The KEGG KO assignments that were generated  
337 were then assigned to major functional groupings and visualized with the MicrobiomeAnalyst Shotgun Data  
338 Profiling routines.

339 **Data availability.** Raw sequences are available in the National Center for Biotechnology  
340 Information (NCBI) Sequence Read Archive (SRA) under project number PRJNA625928, accession numbers  
341 SAMN14596532 to SAMN14596550.

342

### 343 ACKNOWLEDGEMENTS

344

345 Funding for this work was provided by the USGS Ecosystems Mission Area Fisheries Program and by NOAA's  
346 Coral Reef Conservation Program Project # 1133 (C.M.W.).

347

348 We thank the National Park Service and the Florida Bay Interagency Science Center, Key Largo FL for  
349 providing laboratory and housing facilities and Christopher Kavanagh, Marine Ecologist for coordinating  
350 these arrangements and providing logistical support.

351

352 Roles in this research were equally shared by five scientists. W.B.S provided conceptualization, data  
353 curation, formal analysis, investigation, methodology, validation, visualization and writing the original draft  
354 manuscript. D.D.I. provided data curation, investigation, resources, writing – review and editing. K.M.B.  
355 provided funding acquisition, investigation, project administration, resources, supervision and writing –  
356 review and editing. C.M.W. provided funding acquisition, investigation, project administration, resources,  
357 and writing in review and editing. A.B. provided project administration and resources. K.N. provided  
358 resources and writing – review and editing.

359

360 Any use of trade, firm, or product names is for descriptive purposes only and does not imply endorsement  
361 by the U.S. Government.

362

363 Disclaimer: The views and analysis in this manuscript are solely those of the authors and do not necessarily  
364 reflect those of NOAA or National Ocean Service. The content of and findings within this document do not  
365 reflect NOAA policy.

366

DRAFT

367 **REFERENCES**

- 368 1. Precht WF, Gintert BE, Robbart ML, Fura R, van Woesik R. 2016. Unprecedented Disease-Related  
369 Coral Mortality in Southeastern Florida. *Sci Rep* 6:31374.
- 370 2. FKNMS. 2020. Florida Reef Tract Coral Disease Outbreak: Disease, on Florida Keys National Marine  
371 Sanctuary, Office of National Marine Sanctuaries, National Oceanic and Atmospheric  
372 Administration, U.S. Department of Commerce. Accessed April 6.
- 373 3. Neely K. 2018. Surveying the Florida Keys Southern Coral Disease Boundary. Florida DEP, Miami,  
374 FL.
- 375 4. Pollock FJ, Morris PJ, Willis BL, Bourne DG. 2011. The Urgent Need for Robust Coral Disease  
376 Diagnostics. *PLoS Path* 7:e1002183.
- 377 5. Walker DI, Ormond RFG. 1982. Coral death from sewage and phosphate pollution at Aqaba, Red  
378 Sea. *Mar Pollut Bull* 13:21-25.
- 379 6. Neely KL. 2018. Ex-Situ Disease Treatment Trials. Florida DEP, Miami, FL.
- 380 7. Neely K, Macaulay K, Hower E, Dobler M. 2019. Effectiveness of topical antibiotics in treating corals  
381 affected by Stony Coral Tissue Loss Disease. *bioRxiv* 1:870402.
- 382 8. O'Neil K, Neely K, Patterson J. 2018. Nursery management of disease-ravaged pillar coral  
383 (*Dendrogyra cylindrus*) on the Florida Reef Tract. Florida DEP, Miami, FL.
- 384 9. Voss J, Shilling E, Combs I. 2019. Intervention and fate tracking for corals affected by stony coral  
385 tissue loss disease in the northern Florida Reef Tract. Florida DEP, Miami, FL.
- 386 10. Walker B, Pitts K. 2019. Reef-building-coral Response to Amoxicillin Intervention and Broader-scale  
387 Coral Disease Intervention. Florida DEP, Miami, FL.
- 388 11. Aeby GS, Ushijima B, Campbell JE, Jones S, Williams GJ, Meyer JL, Häse C, Paul VJ. 2019.  
389 Pathogenesis of a Tissue Loss Disease Affecting Multiple Species of Corals Along the Florida Reef  
390 Tract. *Frontiers in Marine Science* 6.

- 391 12. Ahmad AF, Dwivedi G, O’Gara F, Caparros-Martin J, Ward NC. 2019. The gut microbiome and  
392 cardiovascular disease: current knowledge and clinical potential. *American Journal of Physiology-  
393 Heart and Circulatory Physiology* 317:H923-H938.
- 394 13. Huttenhower C, Gevers D, Knight R, Abubucker S, Badger JH, Chinwalla AT, Creasy HH, Earl AM,  
395 FitzGerald MG, Fulton RS, Giglio MG, Hallsworth-Pepin K, Lobos EA, Madupu R, Magrini V, Martin  
396 JC, Mitreva M, Muzny DM, Sodergren EJ, Versalovic J, Wollam AM, Worley KC, Wortman JR, Young  
397 SK, Zeng Q, Aagaard KM, Abolude OO, Allen-Vercoe E, Alm EJ, Alvarado L, Andersen GL, Anderson S,  
398 Appelbaum E, Arachchi HM, Armitage G, Arze CA, Ayvaz T, Baker CC, Begg L, Belachew T, Bhonagiri  
399 V, Bihan M, Blaser MJ, Bloom T, Bonazzi V, Paul Brooks J, Buck GA, Buhay CJ, Busam DA, Campbell  
400 JL, et al. 2012. Structure, function and diversity of the healthy human microbiome. *Nature* 486:207-  
401 214.
- 402 14. Segata N, Izard J, Waldron L, Gevers D, Miropolsky L, Garrett WS, Huttenhower C. 2011.  
403 Metagenomic biomarker discovery and explanation. *Genome Biol* 12:R60.
- 404 15. Verster AJ, Borenstein E. 2018. Competitive lottery-based assembly of selected clades in the human  
405 gut microbiome. *Microbiome* 6:186-186.
- 406 16. Bass D, Stentiford GD, Wang HC, Koskella B, Tyler CR. 2019. The Pathobiome in Animal and Plant  
407 Diseases. *Trends Ecol Evol* 34:996-1008.
- 408 17. Burke C, Thomas T, Lewis M, Steinberg P, Kjelleberg S. 2011. Composition, uniqueness and  
409 variability of the epiphytic bacterial community of the green alga *Ulva australis*. *ISME J* 5:590-600.
- 410 18. Elshahed MS, Najar FZ, Aycocock M, Qu C, Roe BA, Krumholz LR. 2005. Metagenomic analysis of the  
411 microbial community at Zodletone Spring (Oklahoma): insights into the genome of a member of the  
412 novel candidate division OD1. *Appl Environ Microbiol* 71:7598-602.
- 413 19. Galbraith H, Iwanowicz D, Spooner D, Iwanowicz L, Keller D, Zelanko P, Adams C. 2018. Exposure to  
414 Synthetic Hydraulic Fracturing Waste Influences the Mucosal Bacterial Community Structure of the  
415 Brook Trout (*Salvelinus fontinalis*) Epidermis. *AIMS Microbiology* 4:413-427.

- 416 20. Ainsworth T, Krause L, Bridge T, Torda G, Raina J-B, Zakrzewski M, Gates RD, Padilla-Gamiño JL,  
417 Spalding HL, Smith C, Woolsey ES, Bourne DG, Bongaerts P, Hoegh-Guldberg O, Leggat W. 2015.  
418 The coral core microbiome identifies rare bacterial taxa as ubiquitous endosymbionts. *The ISME*  
419 *Journal* 9:2261-2274.
- 420 21. Bernasconi R, Stat M, Koenders A, Papparini A, Bunce M, Huggett MJ. 2019. Establishment of Coral-  
421 Bacteria Symbioses Reveal Changes in the Core Bacterial Community With Host Ontogeny. *Front*  
422 *Microbiol* 10.
- 423 22. Huggett MJ, Apprill A. 2019. Coral microbiome database: Integration of sequences reveals high  
424 diversity and relatedness of coral-associated microbes. *Environ Microbiol Rep* 11:372-385.
- 425 23. Pollock FJ, McMinds R, Smith S, Bourne DG, Willis BL, Medina M, Thurber RV, Zaneveld JR. 2018.  
426 Coral-associated bacteria demonstrate phyllosymbiosis and cophylogeny. *Nature Communications*  
427 9:4921.
- 428 24. Sweet MJ, Brown BE, Dunne RP, Singleton I, Bulling M. 2017. Evidence for rapid, tide-related shifts  
429 in the microbiome of the coral *Coelastrea aspera*. *Coral Reefs* 36:815-828.
- 430 25. Meyer JL, Castellanos-Gell J, Aeby GS, Häse CC, Ushijima B, Paul VJ. 2019. Microbial Community  
431 Shifts Associated With the Ongoing Stony Coral Tissue Loss Disease Outbreak on the Florida Reef  
432 Tract. *Front Microbiol* 10.
- 433 26. Rosales SM, Clark AS, Huebner LK, Ruzicka RR, Muller EM. 2020. *Rhodobacterales* and *Rhizobiales*  
434 *Are Associated With Stony Coral Tissue Loss Disease and Its Suspected Sources of Transmission.*  
435 *Front Microbiol* 11.
- 436 27. Siegwald L, Touzet H, Lemoine Y, Hot D, Audebert C, Caboche S. 2017. Assessment of Common and  
437 Emerging Bioinformatics Pipelines for Targeted Metagenomics. *PLoS One* 12:e0169563.
- 438 28. Greub G, La Scola B, Raoult D. 2004. Amoebae-resisting bacteria isolated from human nasal swabs  
439 by amoebal coculture. *Emerg Infect Dis* 10:470-7.

- 440 29. Thomas V, McDonnell G, Denyer SP, Maillard J-Y. 2010. Free-living amoebae and their intracellular  
441 pathogenic microorganisms: risks for water quality. *FEMS Microbiol Rev* 34:231-259.
- 442 30. Strassmann JE, Shu L. 2017. Ancient bacteria–amoeba relationships and pathogenic animal  
443 bacteria. *PLoS Biol* 15:e2002460.
- 444 31. Denoncourt AMVEPSJC. 2014. Potential Role of Bacteria Packaging by Protozoa in the Persistence  
445 and Transmission of Pathogenic Bacteria. *Front Microbiol* 5:240.
- 446 32. Guimaraes AJ, Gomes KX, Cortines JR, Peralta JM, Peralta RH. 2016. *Acanthamoeba spp.* as a  
447 universal host for pathogenic microorganisms: One bridge from environment to host virulence.  
448 *Microbiol Res* 193:30-38.
- 449 33. Hilbi H, Weber SS, Ragaz C, Nyfeler Y, Urwyler S. 2007. Environmental predators as models for  
450 bacterial pathogenesis. *Environ Microbiol* 9:563-75.
- 451 34. Essig A, Heinemann M, Simnacher U, Marre R. 1997. Infection of *Acanthamoeba castellanii* by  
452 *Chlamydia pneumoniae*. *Appl Environ Microbiol* 63:1396-9.
- 453 35. Jacquier N, Aeby S, Lienar J, Greub G. 2013. Discovery of New Intracellular Pathogens by  
454 Amoebal Coculture and Amoebal Enrichment Approaches. *Journal of Visualized Experiments*  
455 80:51055.
- 456 36. Janda WM. 2010. Amoeba-Resistant Bacteria: Their Role in Human Infections. *Clin Microbiol Newsl*  
457 32:177-184.
- 458 37. Long JJ, Jahn CE, Sanchez-Hidalgo A, Wheat W, Jackson M, Gonzalez-Juarrero M, Leach JE. 2018.  
459 Interactions of free-living amoebae with rice bacterial pathogens *Xanthomonas oryzae* pathovars  
460 *oryzae* and *oryzicola*. *PLoS One* 13:e0202941.
- 461 38. Horn M, Harzenetter MD, Linner T, Schmid EN, Muller KD, Michel R, Wagner M. 2001. Members of  
462 the *Cytophaga-Flavobacterium-Bacteroides* phylum as intracellular bacteria of acanthamoebae:  
463 proposal of '*Candidatus Amoebophilus asiaticus*'. *Environ Microbiol* 3:440-9.

- 464 39. Schmitz-Esser S, Tischler P, Arnold R, Montanaro J, Wagner M, Rattei T, Horn M. 2010. The genome  
465 of the amoeba symbiont "*Candidatus* Amoebophilus asiaticus" reveals common mechanisms for  
466 host cell interaction among amoeba-associated bacteria. *J Bacteriol* 192:1045-57.
- 467 40. Apprill A, Weber LG, Santoro AE. 2016. Distinguishing between Microbial Habitats Unravels  
468 Ecological Complexity in Coral Microbiomes. *mSystems* 1:e00143-16.
- 469 41. Jakobsen TH, Hansen MA, Jensen PØ, Hansen L, Riber L, Cockburn A, Kolpen M, Rønne Hansen C,  
470 Ridderberg W, Eickhardt S, Hansen M, Kerpedjiev P, Alhede M, Qvortrup K, Burmølle M, Moser C,  
471 Kühl M, Ciofu O, Givskov M, Sørensen SJ, Høiby N, Bjarnsholt T. 2013. Complete Genome Sequence  
472 of the Cystic Fibrosis Pathogen *Achromobacter xylosoxidans* NH44784-1996 Complies with  
473 Important Pathogenic Phenotypes. *PLoS One* 8:e68484.
- 474 42. Jeukens J, Freschi L, Vincent AT, Emond-Rheault JG, Kukavica-Ibrulj I, Charette SJ, Levesque RC.  
475 2017. A pan-genomic approach to understand the basis of host adaptation in *Achromobacter*.  
476 *Genome Biol Evol* 9:1030-1046.
- 477 43. Traglia GM, Almuzara M, Merquier AK, Adams C, Galanternik L, Vay C, Centrón D, Ramírez MS. 2012.  
478 *Achromobacter xylosoxidans*: An Emerging Pathogen Carrying Different Elements Involved in  
479 Horizontal Genetic Transfer. *Curr Microbiol* 65:673-678.
- 480 44. Morrow KM, Moss AG, Chadwick NE, Liles MR. 2012. Bacterial associates of two Caribbean coral  
481 species reveal species-specific distribution and geographic variability. *Appl Environ Microbiol*  
482 78:6438-6449.
- 483 45. Neave MJ, Michell CT, Apprill A, Voolstra CR. 2014. Whole-genome sequences of three symbiotic  
484 *Endozoicomonas* strains. *Genome announcements* 2:e00802-14.
- 485 46. Neave MJ, Michell CT, Apprill A, Voolstra CR. 2017. *Endozoicomonas* genomes reveal functional  
486 adaptation and plasticity in bacterial strains symbiotically associated with diverse marine hosts. *Sci*  
487 *Rep* 7:40579.

- 488 47. Schill WB, Iwanowicz D, Adams C. 2017. *Endozoicomonas* Dominates the Gill and Intestinal Content  
489 Microbiomes of *Mytilus edulis* from Barnegat Bay, New Jersey. J Shellfish Res 36:391-401, 11.
- 490 48. Ding J-Y, Shiu J-H, Chen W-M, Chiang Y-R, Tang S-L. 2016. Genomic Insight into the Host–  
491 Endosymbiont Relationship of *Endozoicomonas montiporae* CL-33T with its Coral Host. Front  
492 Microbiol 7.
- 493 49. Raina JB, Clode PL, Cheong S, Bougoure J, Kilburn MR, Reeder A, Foret S, Stat M, Beltran V, Thomas-  
494 Hall P, Tapiolas D, Motti CM, Gong B, Pernice M, Marjo CE, Seymour JR, Willis BL, Bourne DG. 2017.  
495 Subcellular tracking reveals the location of dimethylsulfoniopropionate in microalgae and visualises  
496 its uptake by marine bacteria. Elife 6.
- 497 50. Raina JB, Dinsdale EA, Willis BL, Bourne DG. 2010. Do the organic sulfur compounds DMSP and DMS  
498 drive coral microbial associations? Trends Microbiol 18:101-8.
- 499 51. Raina JB, Tapiolas D, Motti CA, Foret S, Seemann T, Tebben J, Willis BL, Bourne DG. 2016. Isolation  
500 of an antimicrobial compound produced by bacteria associated with reef-building corals. PeerJ  
501 4:e2275.
- 502 52. Raina JB, Tapiolas D, Willis BL, Bourne DG. 2009. Coral-associated bacteria and their role in the  
503 biogeochemical cycling of sulfur. Appl Environ Microbiol 75:3492-501.
- 504 53. Raina JB, Tapiolas DM, Foret S, Lutz A, Abrego D, Ceh J, Seneca FO, Clode PL, Bourne DG, Willis BL,  
505 Motti CA. 2013. DMSP biosynthesis by an animal and its role in coral thermal stress response.  
506 Nature 502:677-80.
- 507 54. Tandon K, Chiang P-W, Lu C-Y, Yang S-H, Chen Y-F, Wada N, Chen P-Y, Chang H-Y, Chou M-S, Chen  
508 W-M, Tang S-L. 2019. Dominant coral bacterium *Endozoicomonas acroporae* metabolizes DMSP.  
509 bioRxiv doi:10.1101/519546:519546.
- 510 55. La Rivière M, Roumagnac M, Garrabou J, Bally M. 2013. Transient shifts in bacterial communities  
511 associated with the temperate gorgonian *Paramuricea clavata* in the Northwestern Mediterranean  
512 Sea. PLoS One 8:e57385-e57385.



- 513 56. Bourne D, Iida Y, Uthicke S, Smith-Keune C. 2008. Changes in coral-associated microbial  
514 communities during a bleaching event. *ISME J* 2:350-63.
- 515 57. Pantos O, Bongaerts P, Dennis PG, Tyson GW, Hoegh-Guldberg O. 2015. Habitat-specific  
516 environmental conditions primarily control the microbiomes of the coral *Seriatopora hystrix*. The  
517 *ISME journal* 9:1916-1927.
- 518 58. Mendoza M, Güiza L, Martinez X, Caraballo X, Rojas J, Aranguren LF, Salazar M. 2013. A novel agent  
519 (*Endozoicomonas elysicola*) responsible for epitheliocystis in cobia *Rachycentrum canadum* larvae.  
520 *Dis Aquat Org* 106:31-37.
- 521 59. Bednarz VN, Grover R, Maguer JF, Fine M, Ferrier-Pages C. 2017. The Assimilation of Diazotroph-  
522 Derived Nitrogen by Scleractinian Corals Depends on Their Metabolic Status. *mBio* 8.
- 523 60. Lachnit T, Bosch TCG, Deines P. 2019. Exposure of the Host-Associated Microbiome to Nutrient-  
524 Rich Conditions May Lead to Dysbiosis and Disease Development-an Evolutionary Perspective.  
525 *mBio* 10.
- 526 61. Staley C, Kaiser T, Gidley ML, Enochs IC, Jones PR, Goodwin KD, Sinigalliano CD, Sadowsky MJ, Chun  
527 CL. 2017. Differential Impacts of Land-Based Sources of Pollution on the Microbiota of Southeast  
528 Florida Coral Reefs. *Appl Environ Microbiol* 83:e03378-16.
- 529 62. Lapointe BE, Brewton RA, Herren LW, Porter JW, Hu C. 2019. Nitrogen enrichment, altered  
530 stoichiometry, and coral reef decline at Looe Key, Florida Keys, USA: a 3-decade study. *Mar Biol*  
531 166:108.
- 532 63. Klings JG, Rosales SM, McMinds R, Shaver EC, Shantz AA, Peters EC, Eitel M, Wörheide G, Sharp  
533 KH, Burkepile DE, Silliman BR, Vega Thurber RL. 2019. Phylogenetic, genomic, and biogeographic  
534 characterization of a novel and ubiquitous marine invertebrate-associated *Rickettsiales* parasite,  
535 "*Candidatus Aquarickettsia rohweri*", gen. nov., sp. nov. *The ISME Journal* 13:2938-2953.
- 536 64. Yang SH, Tandon K, Lu CY, Wada N, Shih CJ, Hsiao SS, Jane WN, Lee TC, Yang CM, Liu CT, Denis V,  
537 Wu YT, Wang LT, Huang L, Lee DC, Wu YW, Yamashiro H, Tang SL. 2019. Metagenomic,

- 538 phylogenetic, and functional characterization of predominant endolithic green sulfur bacteria in the  
539 coral *Isopora palifera*. *Microbiome* 7:3.
- 540 65. Christgen SL, Becker DF. 2017. Role of Proline in Pathogen and Host Interactions. *Antioxidants &*  
541 *Redox Signaling* 30:683-709.
- 542 66. Passmore IJ, Letertre MPM, Preston MD, Bianconi I, Harrison MA, Nasher F, Kaur H, Hong HA,  
543 Baines SD, Cutting SM, Swann JR, Wren BW, Dawson LF. 2018. Para-cresol production by  
544 *Clostridium difficile* affects microbial diversity and membrane integrity of Gram-negative bacteria.  
545 *PLoS Path* 14:e1007191-e1007191.
- 546 67. Hopper DJ, Bossert ID, Rhodes-Roberts ME. 1991. p-cresol methylhydroxylase from a denitrifying  
547 bacterium involved in anaerobic degradation of p-cresol. *J Bacteriol* 173:1298-1301.
- 548 68. Burke C, Steinberg P, Rusch D, Kjelleberg S, Thomas T. 2011. Bacterial community assembly based  
549 on functional genes rather than species. *Proc Natl Acad Sci U S A* 108:14288-93.
- 550 69. Muller EM, Sartor C, Alcaraz NI, van Woesik R. 2020. Spatial Epidemiology of the Stony-Coral-  
551 Tissue-Loss Disease in Florida. *Frontiers in Marine Science* 7.
- 552 70. Banerjee S, Schlaeppi K, van der Heijden MGA. 2018. Keystone taxa as drivers of microbiome  
553 structure and functioning. *Nature Reviews Microbiology* 16:567-576.
- 554 71. Hajishengallis G, Darveau RP, Curtis MA. 2012. The keystone-pathogen hypothesis. *Nature Reviews*  
555 *Microbiology* 10:717-725.
- 556 72. Rypien KL, Ward JR, Azam F. 2010. Antagonistic interactions among coral-associated bacteria.  
557 *Environ Microbiol* 12:28-39.
- 558 73. Hernandez-Agreda A, Leggat W, Bongaerts P, Herrera C, Ainsworth TD. 2018. Rethinking the Coral  
559 Microbiome: Simplicity Exists within a Diverse Microbial Biosphere. *mBio* 9:e00812-18.
- 560 74. Klindworth AEPTSJPCQMHHFOG. 2013. Evaluation of general 16S ribosomal RNA gene PCR primers  
561 for classical and next-generation sequencing-based diversity studies. *Nucleic Acids Res* 41:e1.

- 562 75. Minot SK, N.; Greenfield, N.B. 2015. One Codex: A sensitive and accurate data platform for genomic  
563 microbial identification. BioRxiv doi:<http://dx.doi.org/10.1101/027607>.
- 564 76. Dhariwal A, Chong J, Habib S, King IL, Agellon LB, Xia J. 2017. MicrobiomeAnalyst: a web-based tool  
565 for comprehensive statistical, visual and meta-analysis of microbiome data. *Nucleic Acids Res*  
566 45:W180-W188.
- 567 77. Gloor GB, Wu JR, Pawlowsky-Glahn V, Egozcue JJ. 2016. It's all relative: analyzing microbiome data  
568 as compositions. *Ann Epidemiol* 26:322-329.
- 569 78. Clarke KR. 1993. Non-parametric multivariate analyses of changes in community structure. *Aust J*  
570 *Ecol* 18:117-143.
- 571 79. Robinson MD, McCarthy DJ, Smyth GK. 2010. edgeR: a Bioconductor package for differential  
572 expression analysis of digital gene expression data. *Bioinformatics (Oxford, England)* 26:139-140.
- 573 80. Aßhauer KP, Wemheuer B, Daniel R, Meinicke P. 2015. Tax4Fun: predicting functional profiles from  
574 metagenomic 16S rRNA data. *Bioinformatics* 31:2882-2884.

575

**Table 1.** Site number, latitude, longitude, Scientific Name, Abbreviation, Common Name, Status (CN = Clinically Normal, D = Diseased), Depth of Collection (meters), and sample identification of 19 corals collected from Looe Key, Florida.

| Site | Latitude          | Longitude        | Scientific Name                  | Abbreviation | Common Name             | Status | Depth (m) | Sample ID       |
|------|-------------------|------------------|----------------------------------|--------------|-------------------------|--------|-----------|-----------------|
| 1    | N 24° 32' 40.812" | W 81° 24' 30.96" | <i>Colpophyllia natans</i>       | CNAT         | boulder brain coral     | D      | 6.71      | CNAT_DisBgF     |
| 2    | N 24° 32' 44.988" | W 81° 24' 15.84" |                                  |              |                         | D      | 7.01      | CNAT_DisBgBBUnl |
| 2    | N 24° 32' 44.988" | W 81° 24' 15.84" |                                  |              |                         | CN     | 6.40      | CNATHC-8        |
| 2    | N 24° 32' 44.988" | W 81° 24' 15.84" |                                  |              |                         | CN     | 5.18      | CNATHC-9        |
| 1    | N 24° 32' 40.812" | W 81° 24' 30.96" | <i>Dichocoenia stokesii</i>      | DSTO         | elliptical star coral   | D      | 5.49      | DSTO_DisBgJ     |
| 1    | N 24° 32' 40.812" | W 81° 24' 30.96" |                                  |              |                         | D      | 5.49      | DSTO_DisBgL     |
| 1    | N 24° 32' 40.812" | W 81° 24' 30.96" |                                  |              |                         | CN     | 5.49      | DSTOHC-1        |
| 1    | N 24° 32' 40.812" | W 81° 24' 30.96" |                                  |              |                         | CN     | 5.49      | DSTOHC-3        |
| 1    | N 24° 32' 40.812" | W 81° 24' 30.96" | <i>Diploria labyrinthiformis</i> | DLAB         | grooved brain coral     | D      | 6.40      | DLAB_DisBgA     |
| 2    | N 24° 32' 44.988" | W 81° 24' 15.84" |                                  |              |                         | D      | 5.79      | DLAB_DisBgE     |
| 2    | N 24° 32' 44.988" | W 81° 24' 15.84" |                                  |              |                         | CN     | 7.01      | DLABHC-5        |
| 1    | N 24° 32' 40.812" | W 81° 24' 30.96" | <i>Orbicella annularis</i>       | OANN         | lobed star coral        | D      | 7.01      | OANN_DisUNLB    |
| 1    | N 24° 32' 40.812" | W 81° 24' 30.96" |                                  |              |                         | D      | 7.01      | OANN_DisBgD     |
| 2    | N 24° 32' 44.988" | W 81° 24' 15.84" |                                  |              |                         | CN     | 5.49      | OANNHC-6        |
| 2    | N 24° 32' 44.988" | W 81° 24' 15.84" |                                  |              |                         | CN     | 5.79      | OANNHC-7        |
| 1    | N 24° 32' 40.812" | W 81° 24' 30.96" | <i>Pseudodiploria strigosa</i>   | PSTR         | symmetrical brain coral | D      | 5.49      | PSTR_DisBgH     |
| 1    | N 24° 32' 40.812" | W 81° 24' 30.96" |                                  |              |                         | D      | 5.18      | PSTR_DisBgI     |
| 1    | N 24° 32' 40.812" | W 81° 24' 30.96" |                                  |              |                         | CN     | 5.49      | PSTRHC-2        |
| 1    | N 24° 32' 40.812" | W 81° 24' 30.96" |                                  |              |                         | CN     | 5.49      | PSTRHC-4        |

**Table 2. Total numbers of classified reads for each library type, reads trimmed (0.25% of total bacterial reads classified for each coral host species), and classified reads retained for analysis. CNAT = *Colpophyllia natans*; DLAB = *Diploria labyrinthiformis*; DSTO = *Dichocoenia stokesii*; OANN = *Orbicella annularis*; and PSTR = *Pseudodiploria strigosa*.**

|                          |                | Host Coral |        |         |         |         |
|--------------------------|----------------|------------|--------|---------|---------|---------|
| Library Type             | Sequence Reads | CNAT       | DLAB   | DSTO    | OANN    | PSTR    |
| <b>Diseased</b>          | Total          | 420,249    | 66,222 | 204,950 | 784,580 | 226,004 |
|                          | Trimmed        | < 1,051    | < 166  | < 512   | < 1,961 | < 565   |
|                          | Retained       | 419,198    | 66,056 | 204,438 | 782,619 | 225,438 |
| <b>Clinically Normal</b> | Total          | 462,966    | 85,138 | 77,018  | 38,349  | 121,738 |
|                          | Trimmed        | < 1,157    | < 213  | < 193   | < 96    | < 304   |
|                          | Retained       | 461,808    | 84,925 | 76,825  | 38,253  | 121,434 |

**Table 3. Distribution of classified bacterial sequences across clinically normal host coral species.** CNAT = *Colpophyllia natans*; DLAB = *Diploria labyrinthiformis*; DSTO = *Dichocoenia stokesii*; OANN = *Orbicella annularis*; and PSTR = *Pseudodiploria strigosa*.

| Microbe                                      | CNAT | DLAB | DSTO | OANN | PSTR | Species Affected |
|----------------------------------------------|------|------|------|------|------|------------------|
| <i>Achromobacter xylosoxidans</i>            | X    | X    | X    | X    | X    | 5                |
| <i>Achromobacter denitrificans</i>           | X    | X    |      | X    | X    | 4                |
| " <i>Candidatus Amoebophilus asiaticus</i> " | X    | X    |      | X    | X    | 4                |
| <i>Fulvivirga imtechensis</i>                | X    | X    |      | X    | X    | 4                |
| <i>Fulvivirga kasyanovii</i>                 | X    | X    |      | X    | X    | 4                |
| <i>Fabibacter misakiensis</i>                |      | X    |      | X    | X    | 3                |
| <i>Fulvivirga lutimaris</i>                  | X    | X    |      | X    |      | 3                |
| <i>Nitrincola lacinaponensis</i>             | X    |      | X    |      | X    | 3                |
| <i>Rhodospirillum rubrum</i>                 | X    | X    |      | X    |      | 3                |
| <i>Sinorhizobium fredii</i>                  | X    |      | X    |      | X    | 3                |
| 171 More- found on one or two hosts          |      |      |      |      |      |                  |

**Table 4. Distribution of classified bacterial sequences across diseased coral hosts.** CNAT = *Colpophyllia natans*; DLAB = *Diploria labyrinthiformis*; DSTO = *Dichocoenia stokesii*; OANN = *Orbicella annularis*; and PSTR = *Pseudodiploria strigosa*.

| Microbe                                      | CNAT | DLAB | DSTO | OANN | PSTR | Species Affected |
|----------------------------------------------|------|------|------|------|------|------------------|
| <i>Algicola bacteriolytica</i>               | X    | X    | X    | X    | X    | 5                |
| <i>Arcobacter bivalviorum</i>                | X    | X    | X    | X    | X    | 5                |
| <i>Clostridioides difficile</i>              | X    | X    | X    | X    | X    | 5                |
| <i>Arcobacter sp. UDC415</i>                 |      | X    | X    | X    | X    | 4                |
| " <i>Candidatus Amoebophilus asiaticus</i> " | X    | X    | X    | X    |      | 4                |
| <i>Pseudofulvibacter geojedonensis</i>       |      | X    | X    |      | X    | 3                |
| <i>Romboutsia lituseburensis</i>             | X    |      | X    |      | X    | 3                |
| <i>Shimia aquaeponti</i>                     | X    |      | X    | X    |      | 3                |
| <i>Vibrio sp. r24</i>                        | X    |      | X    |      | X    | 3                |
| 95 More- found on one or two hosts           |      |      |      |      |      |                  |

**Table 5. Bacterial species enriched in diseased coral hosts as determined by edgeR contrast analysis.**

Designations are predicated at a FDR < 0.01. Shown are the logarithm of 2-fold change (log<sub>2</sub>FC), the logarithm of counts per million reads (log<sub>2</sub>CPM), the Benjamini-Hochberg (B-H) adjusted P value (Pvalue), and the false discovery rate (FDR). The table is sorted from highest to lowest abundance (log<sub>2</sub>CPM).

| Bacterial Species                      | log <sub>2</sub> FC | Log <sub>2</sub> CPM | Pvalue    | FDR       |
|----------------------------------------|---------------------|----------------------|-----------|-----------|
| <i>Clostridioides difficile</i>        | 5.832               | 16.425               | 3.160E-06 | 9.071E-06 |
| <i>Arcobacter bivalviorum</i>          | 11.320              | 16.378               | 1.253E-11 | 2.042E-09 |
| <i>Tepidibacter mesophilus</i>         | 8.471               | 13.556               | 1.669E-06 | 5.440E-06 |
| <i>Algicola bacteriolytica</i>         | 4.113               | 13.416               | 1.801E-03 | 2.718E-03 |
| <i>Shimia aquaeponti</i>               | 8.262               | 13.341               | 1.943E-07 | 1.131E-06 |
| <i>Vibrio sp. r24</i>                  | 8.190               | 13.263               | 1.752E-08 | 2.561E-07 |
| <i>Marinilabilia nitratreducens</i>    | 7.999               | 13.082               | 3.786E-07 | 1.870E-06 |
| <i>Burkholderia gladioli</i>           | 7.912               | 12.996               | 4.535E-07 | 2.174E-06 |
| <i>Pseudofulvibacter geojedonensis</i> | 7.795               | 12.885               | 2.781E-06 | 8.243E-06 |
| <i>Marinifilum fragile</i>             | 7.756               | 12.845               | 1.299E-06 | 4.504E-06 |
| <i>Staphylococcus epidermidis</i>      | 3.957               | 12.802               | 4.630E-03 | 6.799E-03 |
| <i>Vibrio nigripulchritudo</i>         | 7.559               | 12.638               | 3.033E-08 | 3.166E-07 |
| <i>Pseudahrensia aquimaris</i>         | 7.477               | 12.577               | 1.191E-05 | 2.520E-05 |
| <i>Tenacibaculum litopenaei</i>        | 7.367               | 12.464               | 2.712E-06 | 8.185E-06 |
| <i>Abyssivirga alkaniphila</i>         | 4.250               | 12.215               | 2.063E-03 | 3.084E-03 |
| <i>Amphritea japonica</i>              | 7.080               | 12.169               | 5.726E-08 | 5.490E-07 |
| <i>Romboutsia lituseburensis</i>       | 7.009               | 12.094               | 1.885E-08 | 2.561E-07 |
| <i>Vibrio alginolyticus</i>            | 6.990               | 12.070               | 2.569E-09 | 6.978E-08 |
| <i>Carboxylicivirga taeanensis</i>     | 6.870               | 11.979               | 6.971E-06 | 1.623E-05 |
| <i>Meridianimaribacter flavus</i>      | 6.601               | 11.713               | 1.571E-06 | 5.226E-06 |
| <i>Rhizobium sp. Trp 3</i>             | 6.397               | 11.519               | 4.939E-06 | 1.258E-05 |
| <i>Vibrio harveyi</i>                  | 6.314               | 11.409               | 2.097E-09 | 6.836E-08 |
| <i>Arcobacter molluscorum</i>          | 6.236               | 11.364               | 4.615E-06 | 1.194E-05 |
| <i>Mesorhizobium sp.</i>               | 6.210               | 11.341               | 9.035E-06 | 2.045E-05 |
| <i>Yersinia enterocolitica</i>         | 6.165               | 11.286               | 5.160E-07 | 2.336E-06 |



|                                         |       |        |           |           |
|-----------------------------------------|-------|--------|-----------|-----------|
| <i>Shimia isopora</i>                   | 6.062 | 11.193 | 1.990E-06 | 6.360E-06 |
| <i>Natronoflexus pectinivorans</i>      | 5.979 | 11.117 | 6.027E-06 | 1.489E-05 |
| <i>Vibrio parahaemolyticus</i>          | 5.961 | 11.072 | 4.088E-09 | 9.519E-08 |
| <i>Fusibacter paucivorans</i>           | 5.876 | 11.019 | 4.533E-06 | 1.192E-05 |
| <i>Eubacterium tenue</i>                | 5.801 | 10.948 | 3.972E-06 | 1.061E-05 |
| <i>Aestuarius halophilus</i>            | 5.789 | 10.941 | 1.074E-05 | 2.399E-05 |
| <i>Lentibacter algarum</i>              | 5.586 | 10.749 | 8.574E-06 | 1.968E-05 |
| <i>Clostridium thermosuccinogenes</i>   | 5.576 | 10.732 | 2.431E-06 | 7.621E-06 |
| <i>Pseudoalteromonas haloplanktis</i>   | 5.541 | 10.685 | 7.903E-08 | 6.134E-07 |
| <i>Mesorhizobium loti</i>               | 5.431 | 10.593 | 8.378E-07 | 3.339E-06 |
| <i>Oceanirhabdus sediminicola</i>       | 5.420 | 10.593 | 1.106E-05 | 2.403E-05 |
| <i>Thalassolituus oleivorans</i>        | 5.405 | 10.553 | 3.108E-08 | 3.166E-07 |
| <i>Ketogulonicigenium vulgare</i>       | 5.362 | 10.521 | 1.754E-07 | 1.077E-06 |
| <i>Tissierella creatinini</i>           | 5.257 | 10.443 | 1.833E-05 | 3.727E-05 |
| <i>Vibrio vulnificus</i>                | 5.169 | 10.334 | 2.574E-08 | 2.997E-07 |
| <i>Alkaliphilus peptidifermentans</i>   | 5.054 | 10.241 | 5.114E-07 | 2.336E-06 |
| <i>Roseovarius aestuarii</i>            | 4.988 | 10.185 | 9.409E-07 | 3.573E-06 |
| <i>Bythopirellula goksoyri</i>          | 4.962 | 10.180 | 3.012E-05 | 5.644E-05 |
| <i>Tissierella praeacuta</i>            | 4.791 | 10.023 | 2.896E-05 | 5.489E-05 |
| <i>Myroides indicus</i>                 | 4.649 | 9.901  | 4.199E-05 | 7.690E-05 |
| <i>Tindallia magadiensis</i>            | 4.619 | 9.870  | 1.852E-05 | 3.727E-05 |
| <i>Marinifilum albidiflavum</i>         | 4.582 | 9.837  | 1.589E-05 | 3.278E-05 |
| <i>Epibacterium multivorans</i>         | 4.538 | 9.796  | 1.096E-05 | 2.403E-05 |
| <i>Rhizobium tropici</i>                | 4.513 | 9.774  | 1.125E-05 | 2.412E-05 |
| <i>Cohaesibacter gelatinilyticus</i>    | 4.399 | 9.684  | 4.486E-05 | 8.124E-05 |
| <i>Amphritea ceti</i>                   | 4.285 | 9.572  | 6.391E-06 | 1.551E-05 |
| <i>Hoeflea phototrophica</i>            | 4.195 | 9.521  | 2.868E-04 | 4.583E-04 |
| <i>Cohaesibacter haloalkalitolerans</i> | 4.186 | 9.505  | 8.503E-05 | 1.444E-04 |
| <i>Pseudoteredinibacter isopora</i>     | 4.144 | 9.473  | 1.133E-04 | 1.903E-04 |

|                                   |       |       |           |           |
|-----------------------------------|-------|-------|-----------|-----------|
| <i>Vibrio cholerae</i>            | 4.140 | 9.464 | 5.581E-05 | 9.996E-05 |
| <i>Clostridium scindens</i>       | 4.040 | 9.388 | 2.032E-04 | 3.280E-04 |
| <i>Sunxiuqinia elliptica</i>      | 3.992 | 9.352 | 3.222E-04 | 5.098E-04 |
| <i>Streptomyces lazareus</i>      | 3.931 | 9.297 | 1.627E-04 | 2.652E-04 |
| <i>Kordiimonas gwangyangensis</i> | 3.665 | 9.089 | 3.531E-04 | 5.533E-04 |

DRAFT

**Table 6. Bacterial species enriched in clinically normal coral hosts as determined by edgeR contrast analysis.** Designations are predicated at a FDR < 0.01. Shown are the logarithm of 2-fold change (log<sub>2</sub>FC), the logarithm of counts per million reads (log<sub>2</sub>CPM), the Benjamini-Hochberg (B-H) adjusted P value (Pvalue), and the false discovery rate (FDR). The table is sorted from highest to lowest abundance (log<sub>2</sub>CPM).

| Bacterial Species                        | log <sub>2</sub> FC | Log <sub>2</sub> CPM | Pvalue    | FDR       |
|------------------------------------------|---------------------|----------------------|-----------|-----------|
| <i>Heliobacterium oregonensis</i>        | -10.362             | 15.430               | 6.492E-08 | 5.569E-07 |
| <i>Aureivirga marina</i>                 | -10.051             | 15.121               | 2.288E-07 | 1.243E-06 |
| <i>Blastocatella fastidiosa</i>          | -3.996              | 14.774               | 5.076E-03 | 7.388E-03 |
| <i>Chloroflexus aurantiacus</i>          | -3.283              | 13.728               | 4.550E-03 | 6.742E-03 |
| <i>Mycoplasma mycoides</i>               | -4.034              | 13.702               | 1.188E-03 | 1.809E-03 |
| <i>Spirosoma navajo</i>                  | -8.304              | 13.383               | 2.275E-08 | 2.852E-07 |
| <i>Muricauda lutaonensis</i>             | -7.559              | 12.652               | 9.644E-07 | 3.573E-06 |
| <i>Iamia majanohamensis</i>              | -7.537              | 12.632               | 1.785E-07 | 1.077E-06 |
| <i>Streptococcus sanguinis</i>           | -7.125              | 12.227               | 9.605E-07 | 3.573E-06 |
| <i>Candidatus Solibacter usitatus</i>    | -6.976              | 12.083               | 3.459E-07 | 1.762E-06 |
| <i>Spirochaeta halophila</i>             | -6.873              | 11.983               | 2.153E-07 | 1.210E-06 |
| <i>Bacillus licheniformis</i>            | -6.848              | 11.958               | 1.708E-07 | 1.077E-06 |
| <i>Klebsiella pneumoniae</i>             | -6.813              | 11.925               | 8.615E-09 | 1.560E-07 |
| <i>Vibrio sp. Cl G9</i>                  | -6.470              | 11.595               | 3.172E-06 | 9.071E-06 |
| <i>Marinoscillum furvescens</i>          | -6.464              | 11.591               | 7.350E-07 | 3.153E-06 |
| <i>Dictyoglomus turgidum</i>             | -6.451              | 11.575               | 6.448E-08 | 5.569E-07 |
| <i>Candidatus Phytoplasma fraxini</i>    | -6.442              | 11.567               | 5.657E-09 | 1.153E-07 |
| <i>Fulvivirga kasyanovii</i>             | -6.435              | 11.563               | 1.025E-07 | 7.596E-07 |
| <i>Candidatus Liberibacter asiaticus</i> | -6.419              | 11.545               | 1.214E-08 | 1.979E-07 |
| <i>Aeromonas caviae</i>                  | -6.406              | 11.533               | 1.586E-07 | 1.077E-06 |
| <i>Aciditerrimonas ferrireducens</i>     | -6.282              | 11.421               | 2.604E-06 | 8.009E-06 |
| <i>Arthrobacter davidanieli</i>          | -6.194              | 11.331               | 6.928E-07 | 3.052E-06 |
| <i>Labilibacter aurantiacus</i>          | -5.993              | 11.144               | 6.794E-06 | 1.605E-05 |
| <i>Tamlana agarivorans</i>               | -5.991              | 11.140               | 1.557E-06 | 5.226E-06 |

|                                           |        |        |           |           |
|-------------------------------------------|--------|--------|-----------|-----------|
| <i>Oenococcus oeni</i>                    | -5.984 | 11.133 | 7.049E-08 | 5.745E-07 |
| <i>Algisphaera agarilytica</i>            | -5.923 | 11.079 | 8.398E-07 | 3.339E-06 |
| <i>Eionea nigra</i>                       | -5.829 | 10.990 | 6.472E-06 | 1.551E-05 |
| <i>Ilumatobacter fluminis</i>             | -5.552 | 10.737 | 3.232E-06 | 9.082E-06 |
| <i>Sinorhizobium medicae</i>              | -5.397 | 10.586 | 1.837E-10 | 1.497E-08 |
| <i>Pseudomonas marincola</i>              | -5.360 | 10.558 | 9.923E-07 | 3.594E-06 |
| <i>Gloeobacter violaceus</i>              | -5.269 | 10.472 | 2.584E-07 | 1.359E-06 |
| <i>Pseudomonas putida</i>                 | -5.245 | 10.452 | 1.275E-06 | 4.504E-06 |
| <i>Moraxella catarrhalis</i>              | -5.109 | 10.326 | 7.350E-10 | 3.993E-08 |
| <i>Bartonella bacilliformis</i>           | -5.068 | 10.290 | 1.052E-09 | 4.288E-08 |
| <i>Bdellovibrio bacteriovorus</i>         | -4.794 | 10.052 | 1.997E-05 | 3.970E-05 |
| <i>Pectobacterium atrosepticum</i>        | -4.780 | 10.040 | 1.274E-05 | 2.662E-05 |
| <i>Sulfobacillus thermosulfidooxidans</i> | -4.777 | 10.036 | 8.062E-07 | 3.339E-06 |
| <i>Serratia liquefaciens</i>              | -4.732 | 9.998  | 3.617E-06 | 9.955E-06 |
| <i>Haloferula chungangensis</i>           | -4.553 | 9.845  | 2.867E-05 | 5.489E-05 |
| <i>Roseivirga marina</i>                  | -4.509 | 9.807  | 5.499E-06 | 1.379E-05 |
| <i>Thiopfundum lithotrophicum</i>         | -4.437 | 9.743  | 1.379E-07 | 9.776E-07 |
| <i>Aridibacter kavangonensis</i>          | -4.347 | 9.671  | 3.665E-06 | 9.955E-06 |
| <i>Coxiella burnetii</i>                  | -4.084 | 9.456  | 4.122E-05 | 7.635E-05 |
| <i>Gimesia maris</i>                      | -4.078 | 9.452  | 2.079E-05 | 4.084E-05 |
| <i>Thalassotalea agarivorans</i>          | -4.006 | 9.393  | 6.572E-05 | 1.152E-04 |
| <i>Roseivirga spongicola</i>              | -3.970 | 9.365  | 2.736E-05 | 5.309E-05 |
| <i>Lawsonella clevelandensis</i>          | -3.882 | 9.296  | 8.244E-05 | 1.415E-04 |
| <i>Spiribacter curvatus</i>               | -3.762 | 9.203  | 7.087E-05 | 1.229E-04 |
| <i>Ruegeria intermedia</i>                | -3.647 | 9.113  | 5.797E-05 | 1.027E-04 |
| <i>Lewinella cohaerens</i>                | -3.603 | 9.083  | 1.482E-04 | 2.441E-04 |
| <i>Ekhidna lutea</i>                      | -3.299 | 8.862  | 1.211E-04 | 2.015E-04 |
| <i>Gluconobacter oxydans</i>              | -3.248 | 8.824  | 5.105E-04 | 7.849E-04 |
| <i>Portibacter lacus</i>                  | -3.118 | 8.736  | 3.608E-04 | 5.601E-04 |

**Table 7. Bacterial species present in both diseased and clinically normal coral host samples. Designations are predicated at a FDR < 0.01.** Shown are the logarithm of 2-fold change (log<sub>2</sub>FC), the logarithm of counts per million reads (log<sub>2</sub>CPM), the Benjamini-Hochberg (B-H) adjusted P value (Pvalue), and the false discovery rate (FDR). The table is sorted from highest to lowest abundance (log<sub>2</sub>CPM).

| Bacterial Species                           | log <sub>2</sub> FC | log <sub>2</sub> CPM | Pvalue    | FDR       |
|---------------------------------------------|---------------------|----------------------|-----------|-----------|
| <i>Prosthecochloris vibrioformis</i>        | -0.204              | 16.350               | 8.764E-01 | 8.929E-01 |
| " <i>Candidatus</i> Amoebophilus asiaticus" | -2.296              | 16.193               | 7.091E-02 | 9.713E-02 |
| <i>Arcobacter</i> sp. UDC415                | 2.027               | 15.337               | 1.499E-01 | 1.894E-01 |
| <i>Arcobacter nitrofigilis</i>              | 1.707               | 14.929               | 3.458E-01 | 3.969E-01 |
| <i>Rhodospirillum rubrum</i>                | -2.420              | 14.804               | 7.877E-02 | 1.061E-01 |
| <i>Achromobacter xylosoxidans</i>           | -1.509              | 14.608               | 1.575E-01 | 1.975E-01 |
| <i>Aquimarina muelleri</i>                  | 1.041               | 13.905               | 5.184E-01 | 5.788E-01 |
| <i>Roseivirga seohaensis</i>                | -0.235              | 13.847               | 8.593E-01 | 8.865E-01 |
| <i>Halodesulfovibrio spirochaetisodalis</i> | 2.843               | 13.371               | 6.094E-02 | 8.563E-02 |
| <i>Tepidicaulis marinus</i>                 | 3.848               | 13.261               | 7.222E-03 | 1.042E-02 |
| <i>Candidatus Pelagibacter ubique</i>       | -1.488              | 13.253               | 2.255E-01 | 2.723E-01 |
| <i>Fulvivirga imtechensis</i>               | -1.281              | 12.590               | 2.811E-01 | 3.344E-01 |
| <i>Halodesulfovibrio oceani</i>             | -0.620              | 12.524               | 6.381E-01 | 6.843E-01 |
| <i>Halodesulfovibrio marinisediminis</i>    | -2.349              | 12.495               | 8.180E-02 | 1.093E-01 |
| <i>Achromobacter denitrificans</i>          | -1.600              | 12.418               | 1.092E-01 | 1.435E-01 |
| <i>Pectobacterium carotovorum</i>           | 0.404               | 12.300               | 7.613E-01 | 7.955E-01 |
| <i>Pirellula</i> sp.                        | 0.468               | 12.241               | 6.948E-01 | 7.402E-01 |
| <i>Pseudovibrio denitrificans</i>           | 2.105               | 12.177               | 1.152E-01 | 1.467E-01 |
| <i>Aquisalinus flavus</i>                   | 1.354               | 12.177               | 3.023E-01 | 3.530E-01 |
| <i>Alteromonas macleodii</i>                | -0.096              | 12.151               | 9.073E-01 | 9.073E-01 |
| <i>Wukongibacter baidiensis</i>             | -0.132              | 12.088               | 9.050E-01 | 9.073E-01 |
| <i>Kiloniella spongiae</i>                  | 1.650               | 12.028               | 2.665E-01 | 3.194E-01 |
| <i>Clostridium botulinum</i>                | -0.555              | 11.918               | 5.812E-01 | 6.428E-01 |
| <i>Nitriicola lacinaponensis</i>            | -1.234              | 11.911               | 1.692E-01 | 2.074E-01 |

|                                          |        |        |           |           |
|------------------------------------------|--------|--------|-----------|-----------|
| <i>Rubritalea tangerina</i>              | 1.993  | 11.909 | 8.334E-02 | 1.104E-01 |
| <i>Azospirillum brasilense</i>           | -2.278 | 11.752 | 4.922E-02 | 7.013E-02 |
| <i>Thalassobius mediterraneus</i>        | 1.691  | 11.707 | 1.601E-01 | 1.987E-01 |
| <i>Achromobacter marplatensis</i>        | -1.708 | 11.609 | 7.195E-02 | 9.774E-02 |
| <i>Pseudoalteromonas tetraodonis</i>     | 1.576  | 11.576 | 4.948E-02 | 7.013E-02 |
| <i>Microcystis aeruginosa</i>            | -0.183 | 11.557 | 8.340E-01 | 8.659E-01 |
| <i>Fulvivirga lutimaris</i>              | -1.187 | 11.513 | 3.032E-01 | 3.530E-01 |
| <i>Sinorhizobium fredii</i>              | -0.496 | 11.482 | 5.837E-01 | 6.428E-01 |
| <i>Fabibacter misakiensis</i>            | -0.160 | 11.468 | 8.690E-01 | 8.908E-01 |
| <i>Riemerella anatipestifer</i>          | 0.478  | 11.461 | 7.176E-01 | 7.595E-01 |
| <i>Prosthecochloris indica</i>           | 0.906  | 11.447 | 4.719E-01 | 5.305E-01 |
| <i>Mesoplasma florum</i>                 | -1.018 | 11.403 | 3.309E-01 | 3.826E-01 |
| <i>Amphiplicatus metriothermophilus</i>  | 0.592  | 11.367 | 6.276E-01 | 6.774E-01 |
| <i>Halodesulfobivrio aestuarii</i>       | 1.369  | 11.365 | 3.006E-01 | 3.530E-01 |
| <i>Hoeflea halophila</i>                 | -0.880 | 11.325 | 4.411E-01 | 4.993E-01 |
| <i>Aeromonas salmonicida</i>             | 0.162  | 11.313 | 8.865E-01 | 8.975E-01 |
| <i>Anaplasma platys</i>                  | -1.428 | 11.310 | 1.609E-01 | 1.987E-01 |
| <i>Phyllobacterium leguminum</i>         | 2.050  | 11.304 | 1.137E-01 | 1.467E-01 |
| <i>Thermanaerovibrio acidaminovorans</i> | -2.019 | 11.214 | 6.707E-02 | 9.264E-02 |
| <i>Pelagibius litoralis</i>              | -1.730 | 11.175 | 1.149E-01 | 1.467E-01 |
| <i>Mycoplasma gallisepticum</i>          | -1.600 | 11.071 | 6.322E-02 | 8.808E-02 |
| <i>Woeseia oceani</i>                    | 0.591  | 11.061 | 6.016E-01 | 6.537E-01 |
| <i>Bartonella henselae</i>               | -0.495 | 10.981 | 5.985E-01 | 6.537E-01 |
| <i>Lentisphaera profundii</i>            | 1.572  | 10.951 | 1.150E-01 | 1.467E-01 |
| <i>Natranaerovirga hydrolytica</i>       | 1.088  | 10.929 | 3.718E-01 | 4.238E-01 |
| <i>Acinetobacter radioresistens</i>      | -0.387 | 10.845 | 7.250E-01 | 7.624E-01 |
| <i>Thermosynechococcus elongatus</i>     | 1.385  | 10.806 | 1.772E-01 | 2.155E-01 |

**FIG 1.** Representative samples of five coral species affected by Stony Coral Tissue Loss Disease (SCTLD) at Looe Key, FL in August 2018.

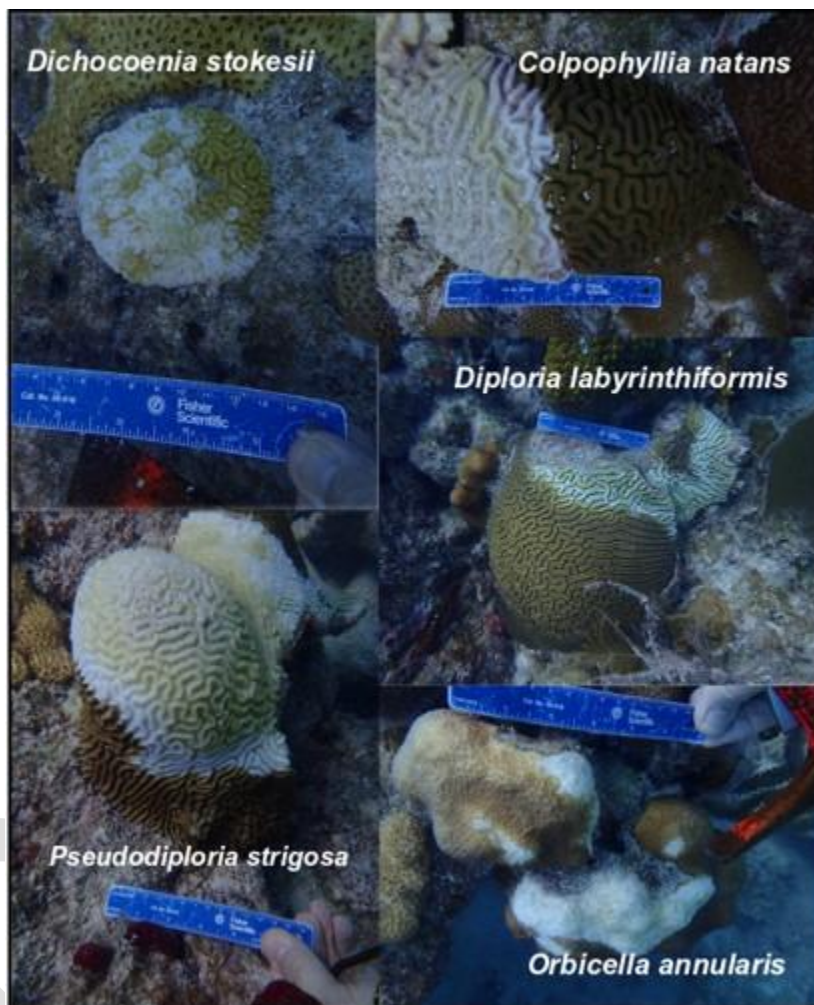



**FIG 2.** Alpha diversity as measured by the Simpson index was generally similar among the microbiomes of all five coral hosts species regardless of health status.

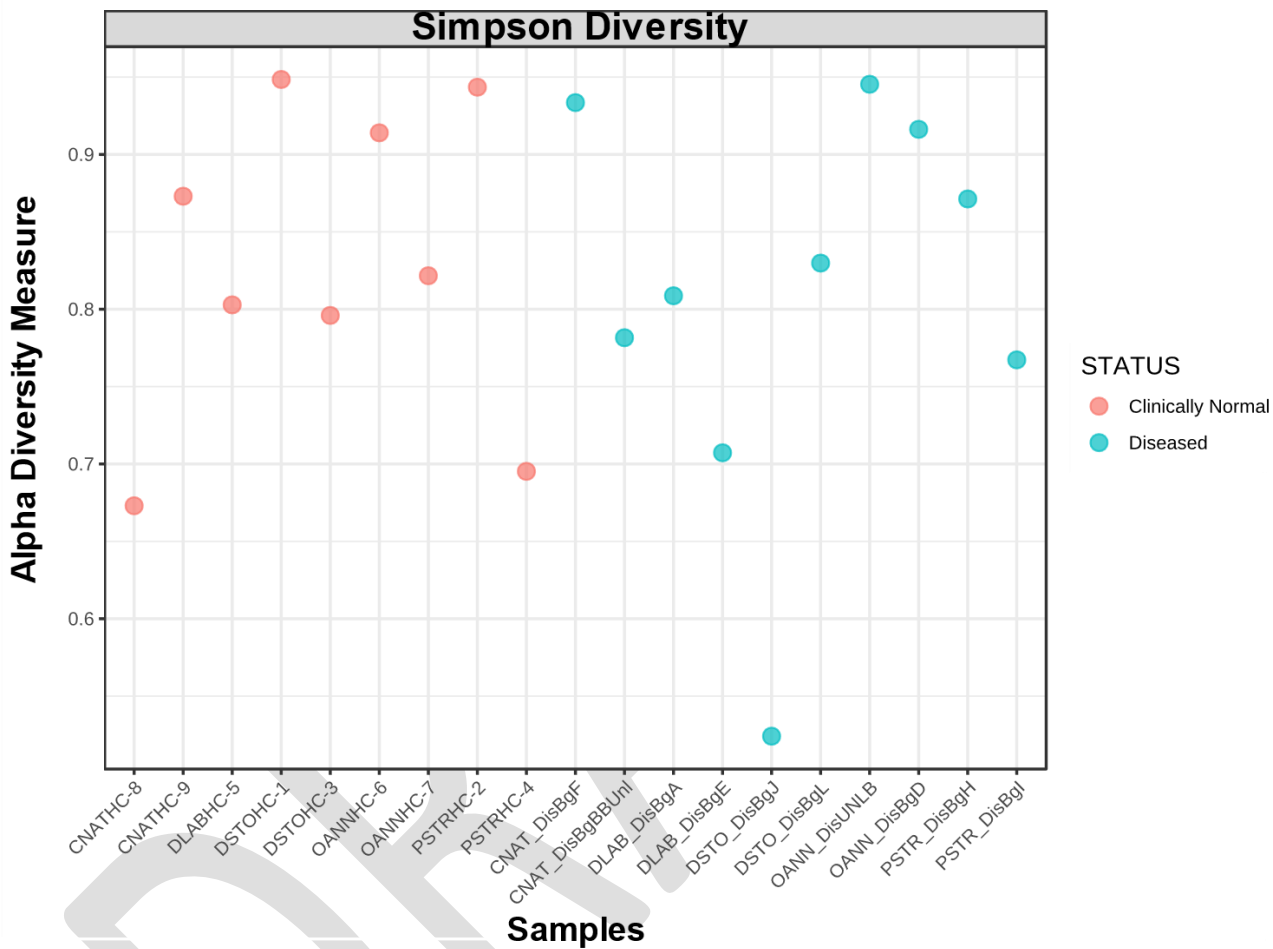



**FIG 3. Nonmetric multidimensional scaling visualization of Jensen-Shannon Divergence measures using ANOSIM demonstrated that the microbiome taxa of five stony coral species affected by SCTLD are distinct between clinically normal and diseased colonies.**

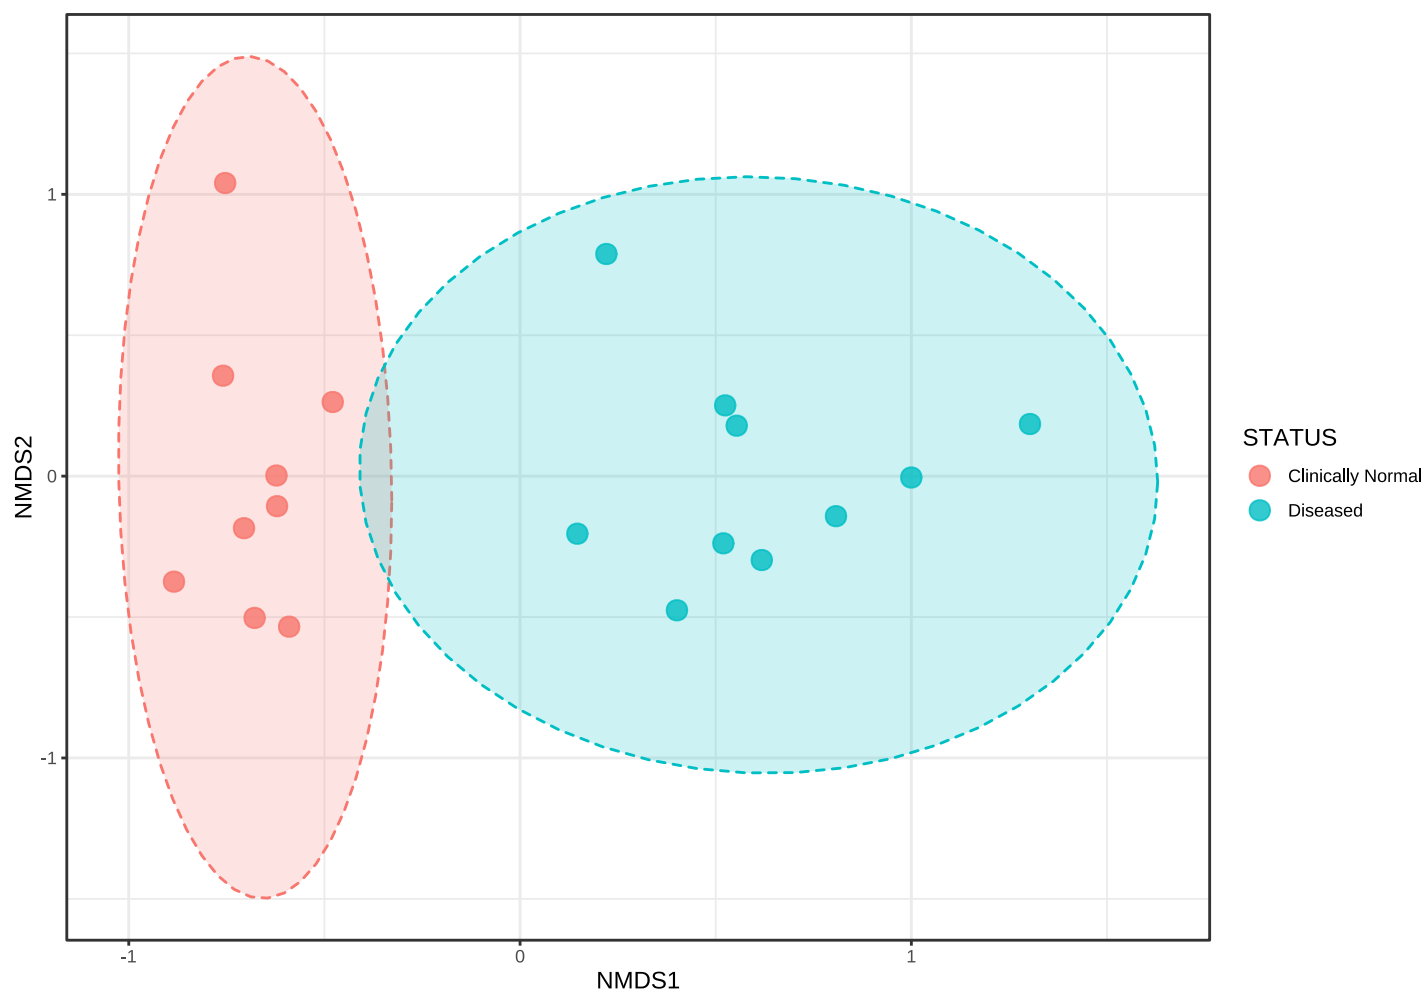

**FIG 4. KEGG metabolism comparison of clinically normal and diseased coral microbiomes. Gene transcription was inferred using Tax4Fun.**

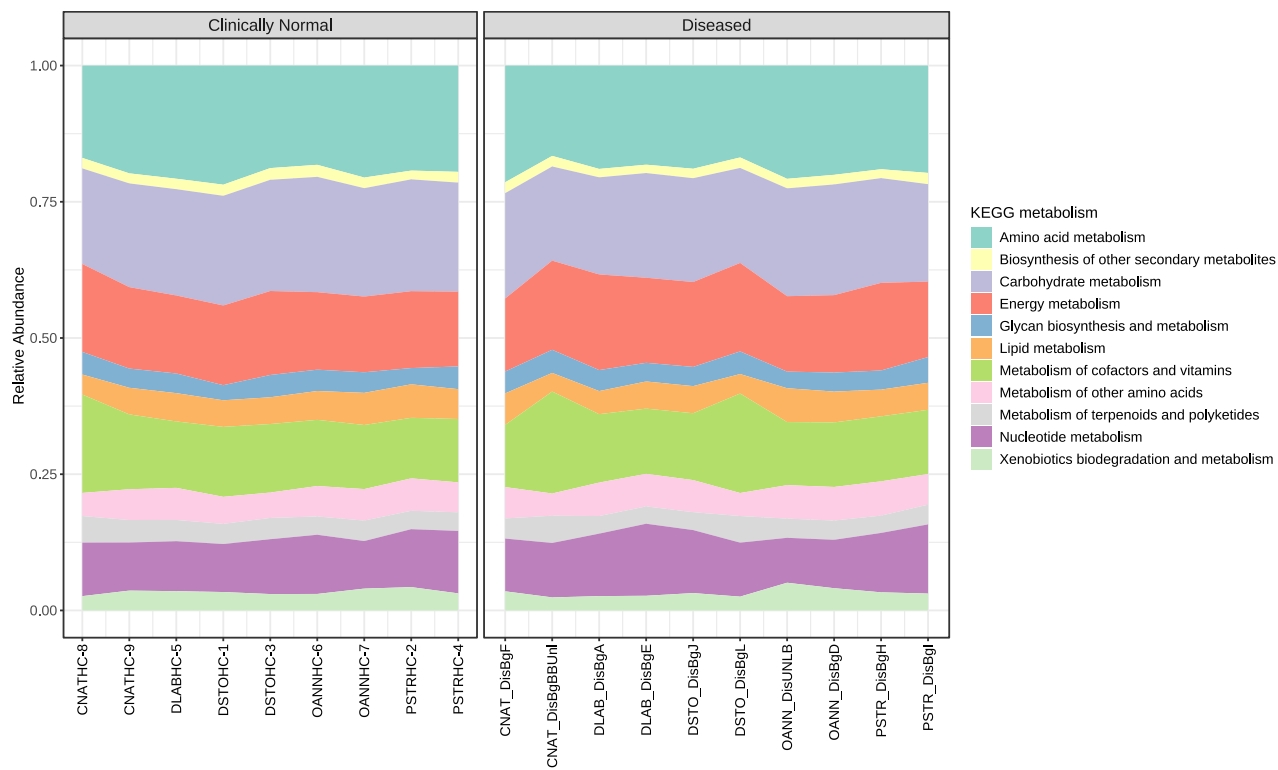

Source: http://biorxiv.org/content/10.1101/2020.05.27.120469v1.full.pdf
